# Supplementary material for: Diselenolene proligands: reactivity and comparison with their dithiolene congeners
Source: Royal Society of Chemistry journal article supplement (doi:10.1039/d1nj01335a), 2021-01-01
Supplement: d1nj01335a1.pdf [file d1nj01335a1.pdf]

## Diselenolene proligands: reactivity and comparison with their dithiolene congeners

Yann Le Gal,<sup>a</sup> Thierry Roisnel,<sup>a</sup> Frédéric Barrière,<sup>a</sup> Takehiko Mori,<sup>b</sup> Dominique Lorcy<sup>a\*</sup>

*a* -Univ Rennes, CNRS, ISCR (Institut des Sciences Chimiques de Rennes)-UMR 6226, F-35000 Rennes, France.

*b* -Department of Materials Science and Engineering, Tokyo Institute of Technology, O-okayama 2-12-1, Meguro-ku, 152-8552, Japan.

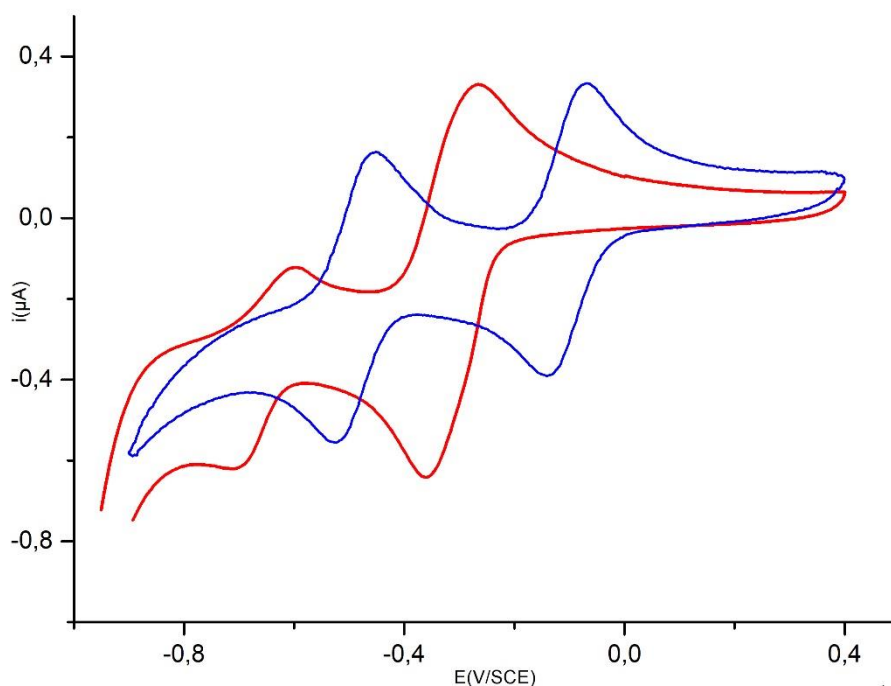

**Fig. S1** Cyclic voltammograms of diselenine **7** (red) and SS-Et (blue) in CH<sub>2</sub>Cl<sub>2</sub> using NBu<sub>4</sub>PF<sub>6</sub> as supporting electrolyte (0.1 M).
